# Supplementary material
Source: HighWire-hosted journal article supplement (https://bmjopen.bmj.com/content/8/12/e023636)
Supplement: inline-supplementary-material-1 [file inline-supplementary-material-1.pdf]

# 説明文書

## 臨床試験のための説明・同意書

(家族性高コレステロール血症における遺伝子検査の有用性の検討)

今から、あなたにこの臨床研究の内容について説明いたします。この説明文書は、私たちの説明をおぎない、あなたの理解を深めるためのものですのでよく読まれて、研究に参加いただけるかどうかご検討ください。

なお、この研究に参加されるかどうかはあなたの自由です。研究に参加した後でも、いつでも自由にやめることができます。もしお断りになっても、あなたのこれからの治療に差し支えることは全くありません。

この研究に参加されるかどうかを決めていただくためには、あなたに研究の内容についてできるだけ多く知っていただくことが必要です。説明の中でわかりにくい言葉や疑問、質問がありましたらどんなことでも遠慮なくお尋ねください。

## 1. 臨床試験とは？

病院で患者さんが今受けておられる治療は、現時点で最も良いと科学的に評価されている治療法が中心になっています。

それでは、どうしたら、最も優れた治療法がわかるのでしょうか？ 新しい治療法（手術法、新薬など）が、これまでの治療より優れているかどうかはどうしたらわかるのでしょうか？

そのことを確かめるために行なうのが、「臨床試験」です。

「臨床試験」とは、試験計画にしたがって患者さんが治療を受けられ、医師はその治療法が患者さんにどのような効果をもたらすかを検討します。また、臨床試験では患者さんの身に及ぶ危険性も考えられるため、どのような試験についても患者さんを危険性から守るための様々な工夫がされています。

この臨床試験は参加された方の安全や人権を守るために、国が定めた基準に従って行われます。また、当院の臨床試験審査委員会で審査を受け、実施について病院長の許可を得ています。なお、臨床試験審査委員会の手順書、委員名簿および会議の記録（臨床試験名、審議結果など）の概要については下記のホームページでご覧になれます。臨床試験に参加いただいている皆様の情報（お名前、ご住所、生年月日、電話番号など）については、公表いたしません。ホームページをご覧にならない方で内容をお知りになりたい方、またホームページをご覧になり、さらに詳しい内容をお知りになりたい方は、ご遠慮なく「先端医療開発センター」（電話：076-265-2049：平日9時から17時まで）までお申し出ください。

金沢大学附属病院「先端医療開発センター」ホームページ

アドレス：<http://icrek.w3.kanazawa-u.ac.jp>

## 2. あなたの病気(症状)について

家族性高コレステロール血症(FH)は、肝臓においてLDLコレステロール(いわゆる悪玉コレステロール)を代謝するLDL受容体ないしはその関連した組織に、遺伝的に機能障害があり、これに伴い血中のコレステロール(主にLDLコレステロール)が著明に上昇する病気です。これにより、狭心症や心筋梗塞などの、冠動脈(心臓を栄養する動脈)が狭窄・閉塞(細くなったり詰まったりする)する可能性が高くなります。この病気に対しては肝臓でのLDL受容体の数や機能を増加・改善しうるHMG-CoA還元酵素阻害薬(スタチン製剤と呼ばれています)により、血中のコレステロール濃度はかなり低下させることができるようになりました。さらに、早期からスタチン製剤を使用することで血中のLDLコレステロール値を改善させ、動脈硬化の進展および冠動脈疾患の発症を予防することが可能であることが示されており、より早期の段階で家族性高コレステロール血症を的確に診断し、早期治療に結びつけることが重要です。

日本において、15歳以上の家族性高コレステロール血症の臨床診断は、高LDLコレステロール血症、腱黄色種の存在、FHの家族歴、の3項目をもとに行われます。確定診断のためには、上記の臨床診断に加えて、主に遺伝子検査が必須です。しかし、遺伝子検査が一部の施設でしか行われていないこと、またその煩雑さと人的・金銭的労力の大きさから、なかなかこの遺伝子検査が浸透しにくい状況でした。さらに、患者さんにとって家族性高コレステロール血症の臨床診断に加えて遺伝子検査を行う診断以上の利点が明らかではなかったのも問題でした。

## 3. 今回の臨床試験について

そこで、今回の臨床試験では、これまで家族性高コレステロール血症に関係する遺伝子解析を受けたことのない家族性高コレステロール患者さんを対象として、従来の患者指導に遺伝子検査の結果説明を含む遺伝カウンセリングと、原因変異保有の有無から導き出される将来の心血管イベント発症リスクの説明を加えることが、家族性高コレステロール患者さんのLDLコレステロール値に影響を与えるかどうかを前向きに検討いたします。遺伝子検査の結果は、遺伝診療の経験が豊富な医師より説明をさせていただき、質問にも答え、十分に理解していただくように努めます。

## 4. 試験の方法について

### 1) 試験期間

臨床試験審査委員会承認後 ~2021年3月31日

### 2) 試験スケジュール

参加予定期間: 臨床試験審査委員会承認後から2019年12月31日まで

参加予定人数: 合計100名

#### ※試験の参加基準(下記を全て満たす患者さんが本研究に参加できます):

- 同意取得時において、年齢が15歳以上
- 性別は問わない
- 日本におけるFH臨床診断基準に合致する
- これまでFHに関する遺伝子解析あるいは結果報告を受けていない
- あなたが本試験参加にあたり十分な説明を受けた、十分な理解の上、あなた(および未成年の場合はその代諾者)の自由意志により文書で同意が得られる

#### ※試験の除外基準(下記のうち一つでも当てはまる場合は本研究に参加できません):

- 高度の肝障害を有する(AST、ALTが基準上限の3倍以上)
- 高度の腎障害を有する( $Cr > 2.0$  mg/dL)
- 免疫抑制状態
- 悪性腫瘍がある
- 冠動脈疾患の既往を有する(以下のいずれかを満たす)
  - 1) 心筋梗塞の既往
  - 2) 経皮的冠動脈形成術・ステント留置術・冠動脈バイパス術の既往
  - 3) 冠動脈造影検査により75%以上の有意狭窄を指摘された既往
- 妊娠中あるいは妊娠の可能性のある女性
- その他、試験責任(分担)医師が被験者として不適当と判断した患者さん

※試験のアウトライン

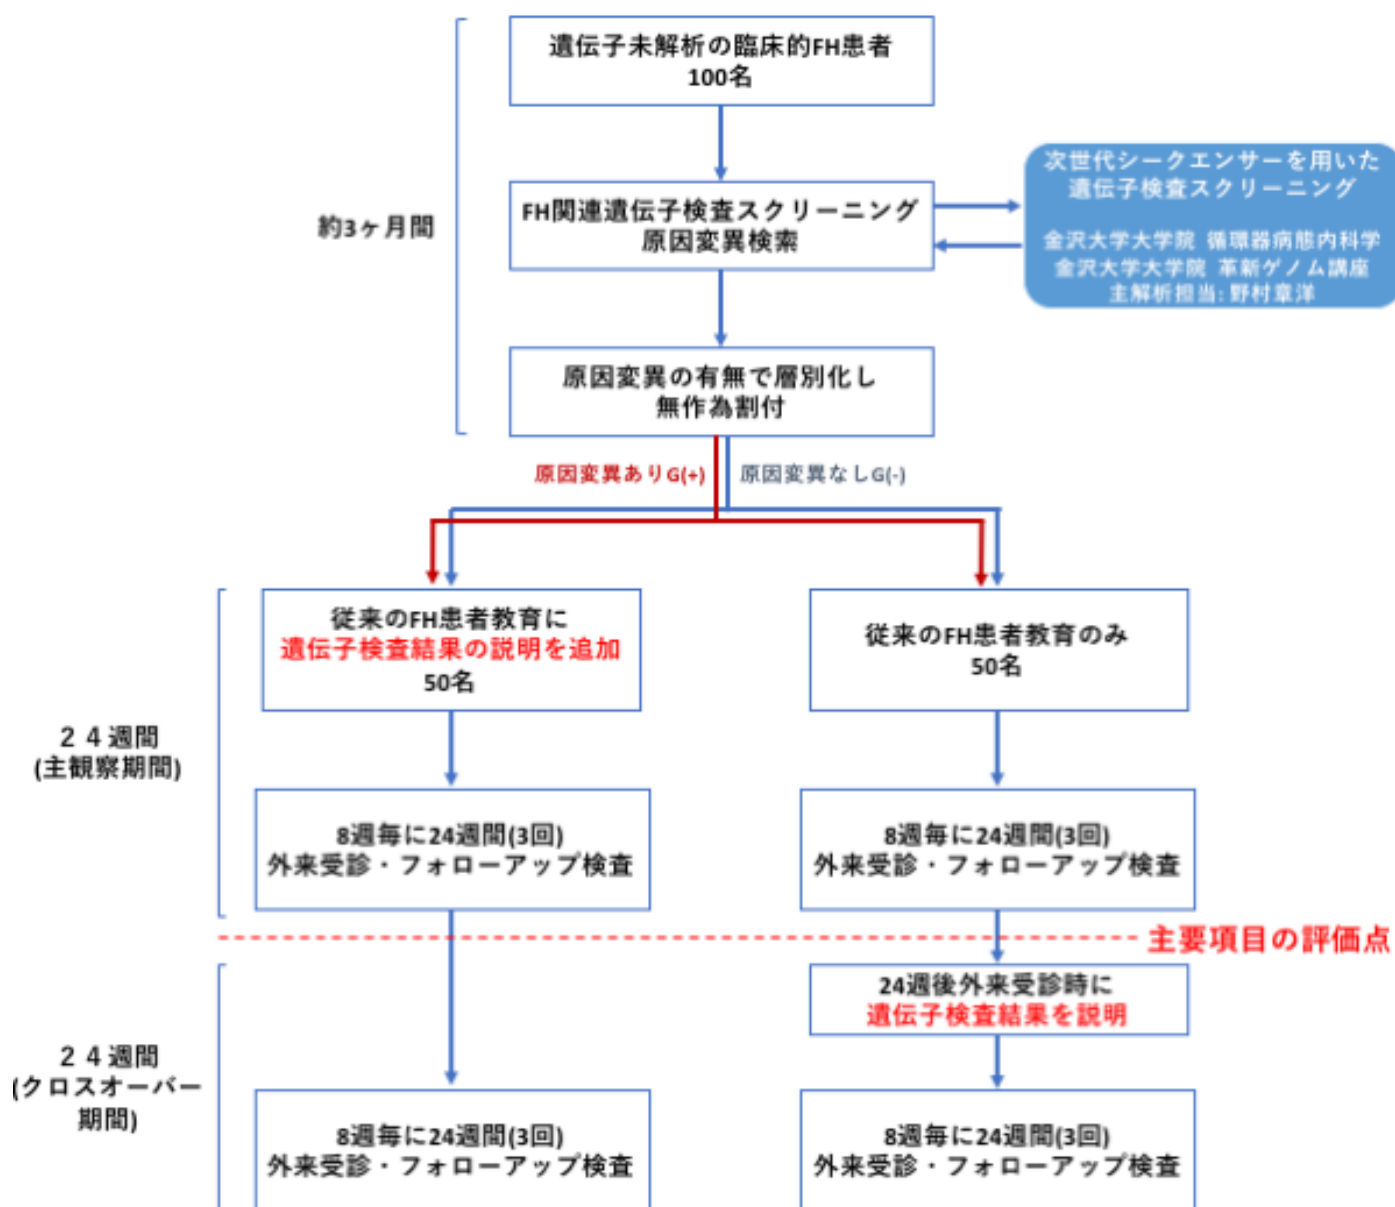

※追加の検査について

FH 関連遺伝子検査スクリーニングを行う際に、遺伝子採血(5ml×2本)を行います。

試験中、採血は原則外来受診時に合計8回行われます。また、外来受診後に、診察室の外であな  
た(被験者ご本人)に患者満足度評価シートへの記入をお願いいたします(合計8回)。

※外来受診について

無作為割付時に、割付された群に応じて30分から1時間程度のカウンセリングがあります。

無作為割付後、8週(±2週間)毎に診察および検査のために外来に来ていただきます。

ただし、外来主治医が医学的に必要と判断された場合は、その他の日程で臨時の受診日が設けら  
れることがあります。



## 5. 予想される効果(効き目)と不利益について

効果について…今回の試験参加そのものによるメリットはありません。ただし、検査結果により、FHに関連する遺伝子変異の保有の有無を知ることができます。

不利益について…遺伝子採血に伴う合併症（皮下血腫、採血側末梢のしびれなど）がある可能性があります。また、遺伝子検査の結果を知ることにより、一時的に不安を感じる、あるいは抑うつ状態等になる場合があります。ただし、そのようなリスクを避けるために、臨床遺伝専門医の資格を持つ医師、あるいは専門医の指導のもと臨床遺伝専門研修中の医師より十分な遺伝カウンセリングを受けていただきます。また、このような遺伝カウンセリングのほかに、あなたが遺伝子検査等に関して心配なことがありましたら、介入群、対照群にかかわらず個別にカウンセリングを受けることが可能ですので、申し出てください。

この試験に参加されている期間中、新たにあなたの試験継続の意思に影響を与えるような情報を入手した場合には、直ちにお知らせいたします。さらに試験を始めた後に、この試験に関して重要な情報が得られた場合は、試験を続けることに関してもう一度同意をいただくことにしています。

## 6. 健康被害が生じた場合の補償について

この試験は、これまでの研究・試験結果に基づいて科学的に計画され、慎重に行われます。

この臨床試験に伴い合併症が出現する可能性がごくわずかです。ただし、遺伝子採血に伴う手技等の合併症を100%予防することは不可能です。少しでも異常な症状が現れたときはすぐにお知らせ下さい。

今回の試験に伴い合併症が発生した場合には、合併症についての適切な治療を行います。しかしながら、治療に伴う費用はご自身の負担となります。

## 7. 試験参加に伴う費用負担について

この臨床試験で行う遺伝子検査および解析費用は、全て研究責任者が所属する診療科の研究費からお支払いいたします。したがって、この試験に参加することにより通常の診療費用と比べて、負担が増えることはありません。

## 8. 記録の保存について

当院におけるこの試験に係る記録(試験等の実施に係わる重要な文書(申請書類の控え、病院長からの通知文書、各種申請書、報告書の控え、被験者識別コードリスト、同意書、その他データの信頼性を保証するのに必要な書類または記録等)、血液から抽出したDNA、および変異情報等の遺伝子解析データ)は、この試験の終了にについて報告された日又はこの試験の結果の最終の公表について報告された日のいずれか遅い時期から電子データ及び観察・実験ノートは10年を経過した日、その他の文書については5年を経過した日までの期間保存され、その後には個人情報に注意して廃棄されます。

また、診療録については、当院の規定に基づき、保管・廃棄を行います。

## 9. 記録の閲覧について

あなたの希望により、他の患者さんの個人情報保護などに差し障りのない範囲内で、この試験の計画や方法についての資料を見ることができます。研究全体の成果については、ご希望があればお知らせいたします。いずれの場合も担当医師へお申し出ください。なお、この研究は、「人を対象とする医学系研究に関する倫理指針」に従い、大学病院医療情報ネットワーク(UMIN-CTR)で公開されていますので、研究の内容や進捗状況、結果等についてご覧いただくこともできます。

## 10. あなたの人権に対する配慮および個人情報の保護について

本試験は、人を対象とする医学系研究に関する倫理指針(厚生労働省告示、平成26年12月)、およびヘルシンキ宣言、当該施設のCOIマネジメント指針を遵守して実施いたします。

研究実施に必要な資料等を取り扱う際は、あなたの個人情報等は無関係の番号を付して管理し、あなたの秘密保護に十分配慮いたします。またデータベースへの登録の際は、要配慮個人情報を除き匿名化されたものを登録いたします。研究の結果を公表する際は、被験者を特定できる情報を含まないようにいたします。また、今回の研究目的以外に得られたあなたの試料等を使用する場合は、改めて研究計画書を倫理委員会に提出し、然るべき対応を行った上で使用いたします。

なお、解析データを研究室が独自に契約するクラウド環境に保管する場合、アクセス制御と使用者認証により研究室が独自に契約するクラウド環境へのアクセスを管理し、暗号化されたコンピュータ端末から安全な接続を用いてデータをアップロードし、保管いたします。データの保管に関して、原則ゲノムデータと臨床情報を同一のデータ保存区域内には保存いたしません。ただし、ゲノムデータと表現系との関係を明らかにする解析を行う際にやむを得ず臨床情報が必要な場合限り、ゲノムデータと臨床情報を同一データ保存区域内に保存し、解析を行います。解析終了後は可



及的速やかに臨床情報をゲノムデータ保存区域内から削除いたします。

この試験で得られた結果は学会や医学雑誌等に発表されることがあります。このような場合、あなたの個人情報などのプライバシーに関するものが公表されることは一切ありません。

また、この試験が適正に行われているかどうかを確認するために、臨床試験審査委員会などの関係者が、あなたの診療に関する記録（他科分や試験参加以前の期間も含みます）を閲覧することがあります。このような場合でも、これらの関係者には守秘義務が課せられていますので、あなたの名前などのプライバシーにかかわる情報は守られます。

なお、最後のページにあります同意文書に署名（または記名・捺印）されますと、この閲覧についてご了解いただいたことになります。

## 1.1. 遺伝子解析の結果の伝え方

今回の臨床試験にご同意頂いた場合、試験スケジュールにありますとおり、どちらの群になりましても最終的にFHに関連する遺伝子変異の検査結果をお伝えいたします。ただし、ご同意後にご自身の結果を知りたくなくなることもあるかもしれません。検査結果の説明を最終的に受けるかどうかはあなたご自身の自由意思によるものですので、ご同意後でも、検査中止や解析結果を知ることにについての判断の変更はいつでも行えます。

また、今回の試験において遺伝子変異の検査結果が陽性・陰性いずれかと判断されましても、将来の遺伝子分野の研究の発展により判定結果が変わる可能性があります。そのような変更がございました場合は、必要に応じて随時ご参加をいただきましたみなさまにご連絡をいたします。

## 1.2. 試験への参加の自由と同意撤回の自由について

この試験に参加するかどうかについては、よく考えていただき、あなた自身の自由な意思でお決めください。また、試験に参加することに同意された後、もしくは試験が始まった後でもいつでも同意を取り下げることができます。もし、お断りになっても、あなたのこれからの治療に差し支えることは一切ありません。

ただし、試験が開始された後に同意を取り下げた場合には、あなたの健康管理のため、追加検査していただく場合があります。また、それまでに得られた結果については、改めて承諾を得た上で使用します。

### 13. 他の検査・治療法について

遺伝子検査を行わない場合でも、通常の高コレステロール血症の治療ガイドラインに基づき、血清脂質値や臨床所見をもとに治療を行います。

### 14. 試験中止となる場合の条件又は理由

- ① あなたが試験の中止を希望した場合あるいは同意の撤回をした場合
- ② ご同意・登録後に試験に不相当であることが判明した場合
- ③ ご病状の悪化などにより試験が好ましくないと判断された場合
- ④ 試験中の有害事象
- ⑤ 試験全体が中止された場合
- ⑥ 妊娠が判明した場合
- ⑦ 担当医師が試験の継続が不相当であると判断した場合

### 15. あなたに守っていただきたいことについて

この試験に参加していただける場合は、次のことをお守りください。

- ① 試験に参加している間は、私たちの指示に従い、必ず診察、検査、投薬等を受けてください。  
もし、来院予定日に来院できない場合は、必ず私たちに連絡してください。
- ② 他の薬を併用することで、血清脂質値に変化があることがあります。そのため、他の病院から出された薬がある場合には、試験参加前に必ず私たちに伝えてください。  
また、試験中に他の病院で治療を受ける場合や新たに薬を使用される場合も、必ず事前に私たちに相談してください。

### 16. この試験参加に係る謝礼について

この試験に参加して頂く事に対する謝礼はございません。

## 17. この試験に係る資金ならびに関連機関との関わりについて

この試験は 診療科の研究費 にて行います。

本研究の研究担当者は「金沢大学臨床研究利益相反マネジメントポリシー」に従い、金沢大学臨床研究利益相反マネジメント委員会に必要事項を申告し、審査と承認を得ています。

この試験において遺伝子検査を行う機械を販売するイルミナ株式会社、および検査試薬を販売するロシュ・ダイアグノスティックス株式会社との間に利害関係はありません。従って、私はこの試験の実施の際に個人的な利益のために専門的な判断を曲げるようなことは一切いたしません。

## 18. 知的財産の帰属について：

この研究から成果が得られ、知的財産権などが生じる可能性があります、その権利は研究グループに帰属します。

## 19. 問い合わせ、苦情等の連絡先：

あなたが、病気のことや今回の遺伝子解析研究に関して、疑問に思うことや困ったことが生じる場合は、下記にご連絡下さい。

試験責任医師；野村 章洋

連絡先：〒920-0934 金沢市宝町13番1号

金沢大学附属病院 先端医療開発センター

電話番号：076-265-2049

ファックス番号：076-265-2090

以上、この臨床試験の内容について十分ご理解いただいたうえで、参加していただける場合は、最終ページの同意文書に同意年月日の記載と署名をしてご提出ください。署名していただきました同意文書は、あなたと病院がそれぞれ保管することになります。

この説明文書と同意文書（患者さん控え）を大切に保管しておいてください。

# 同意文書(臨床試験:6069)

説明・同意書

原本を診療録に保管

保管期限: 診療録と同じ

金沢大学附属病院  
診療科:循環器内科・先端医療開発センター  
責任医師名:野村 章洋 殿

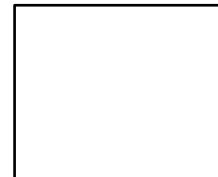

私は、「家族性高コレステロール血症における遺伝子検査の有用性の検討」の臨床試験に参加するにあたり、説明文書を受け取り、内容について説明を受けました。本試験の内容(目的と方法など)を十分に理解しました。また、同意した後であっても、いつでも同意を撤回できること、そのことによって何ら不利益を生じないこと、疑問があればいつでも質問できることについても説明を受け納得しました。つきましては、私自身の自由意志により研究への協力に同意します。

## 1. 本研究に被験者として参加することに同意いたします。

はい      いいえ

- |                                |                                |
|--------------------------------|--------------------------------|
| 1. 臨床試験とは                      | 11. 遺伝子解析の結果の伝え方               |
| 2. あなたの病気(症状)について              | 12. 試験への参加の自由と同意撤回の自由について      |
| 3. 今回の臨床試験について                 | 13. 他の検査・治療法について               |
| 4. 試験の方法について                   | 14. 試験中止となる場合の条件又は理由           |
| 5. 予想される効果(効き目)と不利益について        | 15. あなたに守っていただきたいことについて        |
| 6. 健康被害が生じた場合の補償について           | 16. この試験参加に係る謝礼について            |
| 7. 試験参加に伴う費用負担について             | 17. この試験に係る資金ならびに関連機関との関わりについて |
| 8. 記録の保存について                   | 18. 知的財産権の帰属について               |
| 9. 記録の閲覧について                   | 19. 問い合わせ、苦情等の連絡先              |
| 10. あなたの人権に対する配慮および個人情報の保護について |                                |

## 2. 提供する試料等が本臨床研究に使用された後に、長期保存され、将来、新たに計画・実施される遺伝子解析研究を含む医学研究に使用されることに同意いたします。

はい      いいえ

同意日:西暦      年      月      日

ご本人 ID \_\_\_\_\_ 氏名 \_\_\_\_\_  
氏名(署名) \_\_\_\_\_

〒 - \_\_\_\_\_  
現住所 \_\_\_\_\_

代諾者 氏名(署名) \_\_\_\_\_

〒 - \_\_\_\_\_ 続柄(      )  
現住所 \_\_\_\_\_

説明日:西暦      年      月      日

所属 \_\_\_\_\_

試験責任(分担)医師 \_\_\_\_\_

※臨床試験の同意書は、病歴室経由で先端医療開発センターへ提出してください。

(外来) 同意書原本→病歴室経由で先端医療開発センターへ提出      同意書コピー(1部)→患者さんへ渡す

(入院) 同意書原本→カルテへ保管

同意書コピー(2部)→1部は患者さんへ渡す、1部は病歴室経由で先端医療開発センターへ提出。
