# Supplementary material
Source: HighWire-hosted journal article supplement (https://bmjopen.bmj.com/content/8/12/e023636)
Supplement: inline-supplementary-material-2 [file inline-supplementary-material-2.pdf]

# 家族性高コレステロール血症に関する 遺伝子変異と心臓病

- 血清LDLコレステロール値に比例して心臓病(冠動脈疾患)は増加する
- 同じ血清LDLコレステロール値であっても、家族性高コレステロール血症に関する遺伝子変異があると、変異がない方々に比べて心臓病(冠動脈疾患)に約2-3倍なりやすい\*

\*Khera, A.V., Nomura A, et al. *J Am Coll Cardiol*. 2016. Hayato T, et al. *Eur Heart J*. 2016.

# 遺伝子変異の有無は、心血管疾患の発症オッズに関係する

遺伝子変異なし & <130mg/dL群を1とした場合の  
各群の心血管疾患発症オッズ比

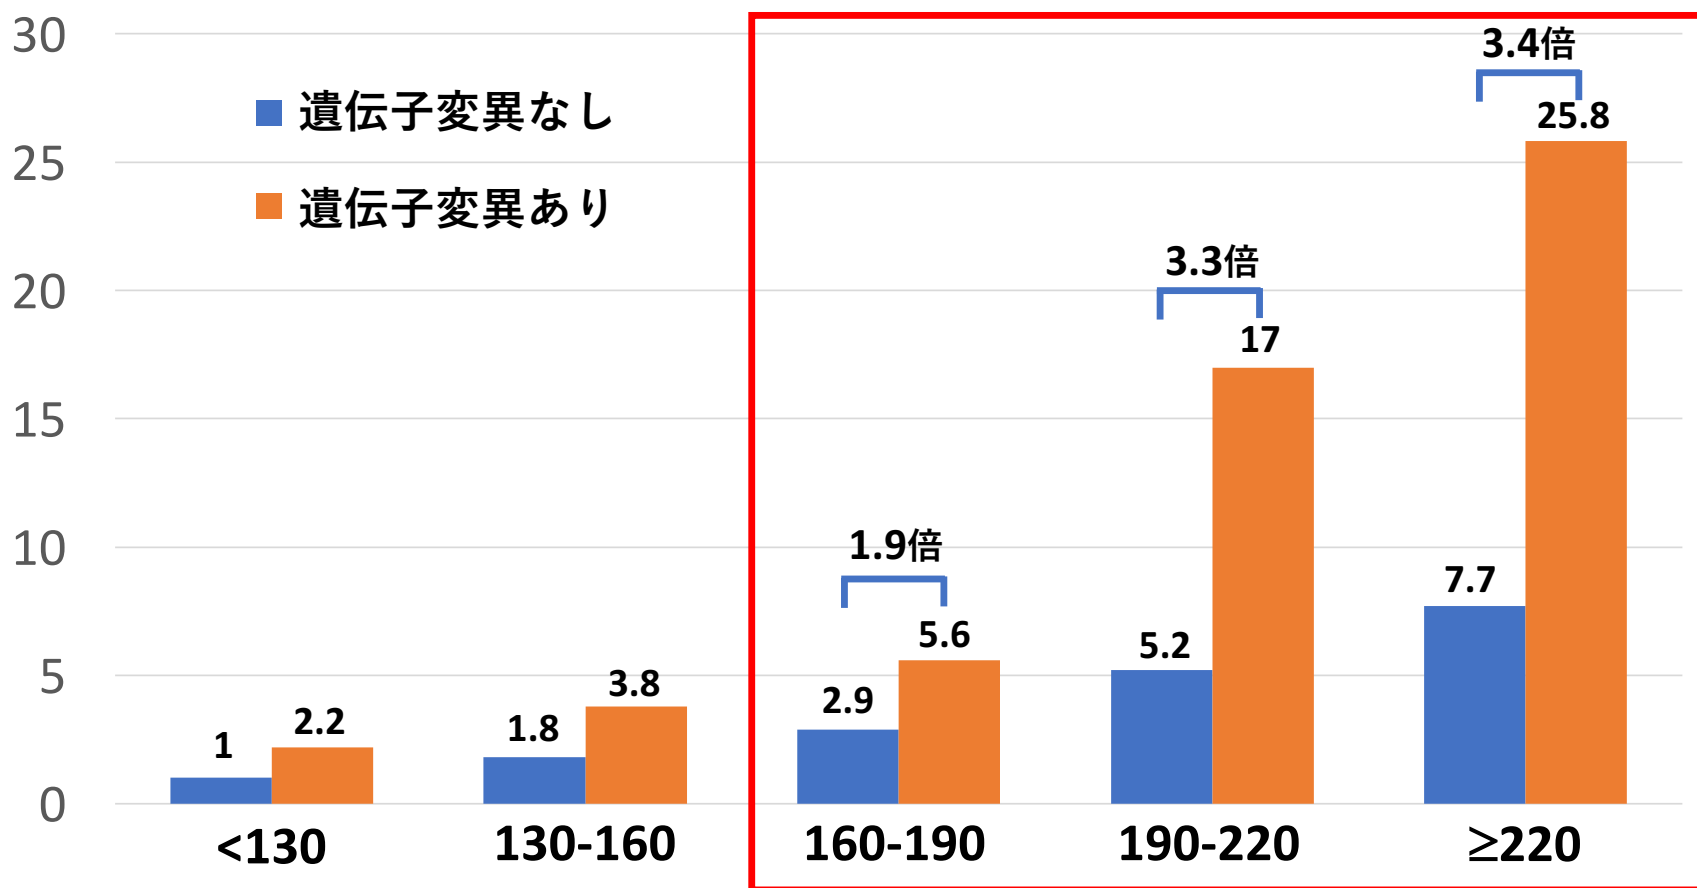

血清LDLコレステロール値 (mg/dL)

家族性高コレステロール血症

# 遺伝子変異の有無は、心血管疾患の発症オッズに関係する (日本人の家族性高コレステロール血症[FH]に限定)

遺伝子変異なし&臨床症状なし群を1とした場合の  
各群の心血管疾患発症オッズ比

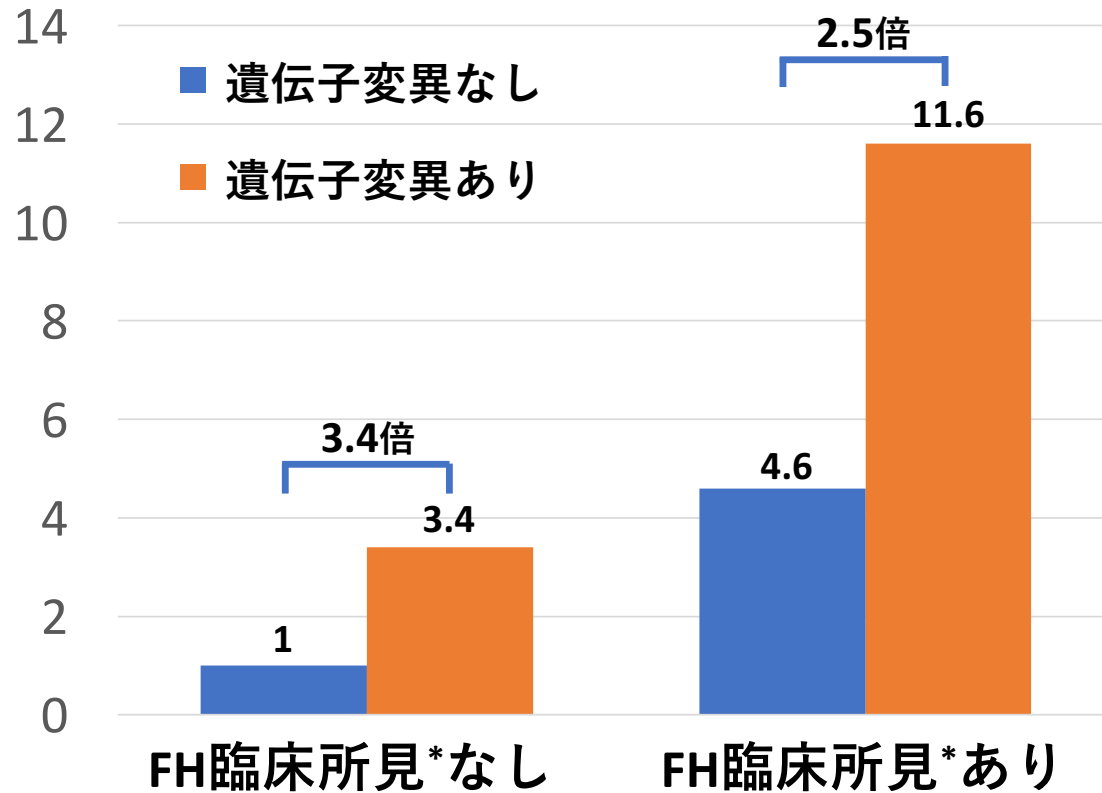

\*FHの家族歴または  
腱黄色腫の存在
